# Supplementary material
Source: ML conference proceedings conference paper supplement (https://openreview.net/forum?id=mR5pknv2oP)
Supplement: supplementary_material [file attachment]

## Supervised Training

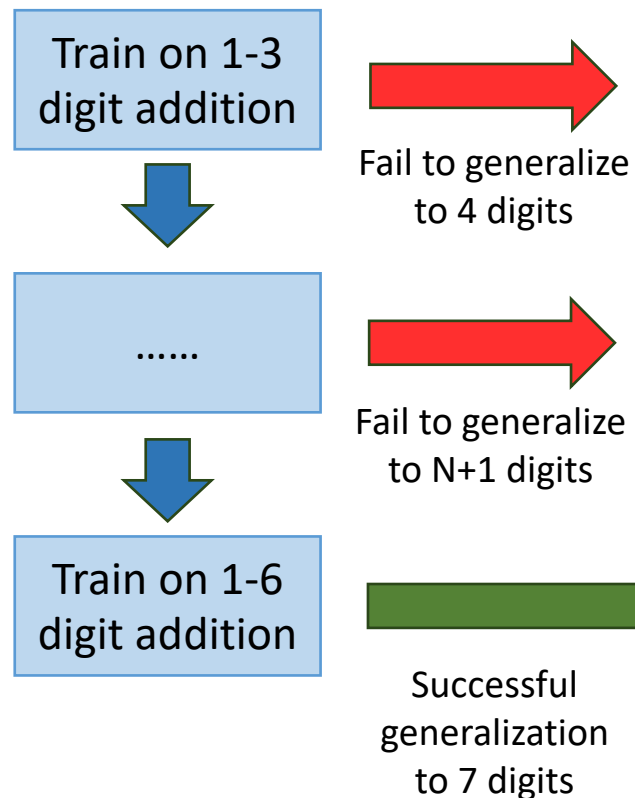

All training data is given to model

## Self Training

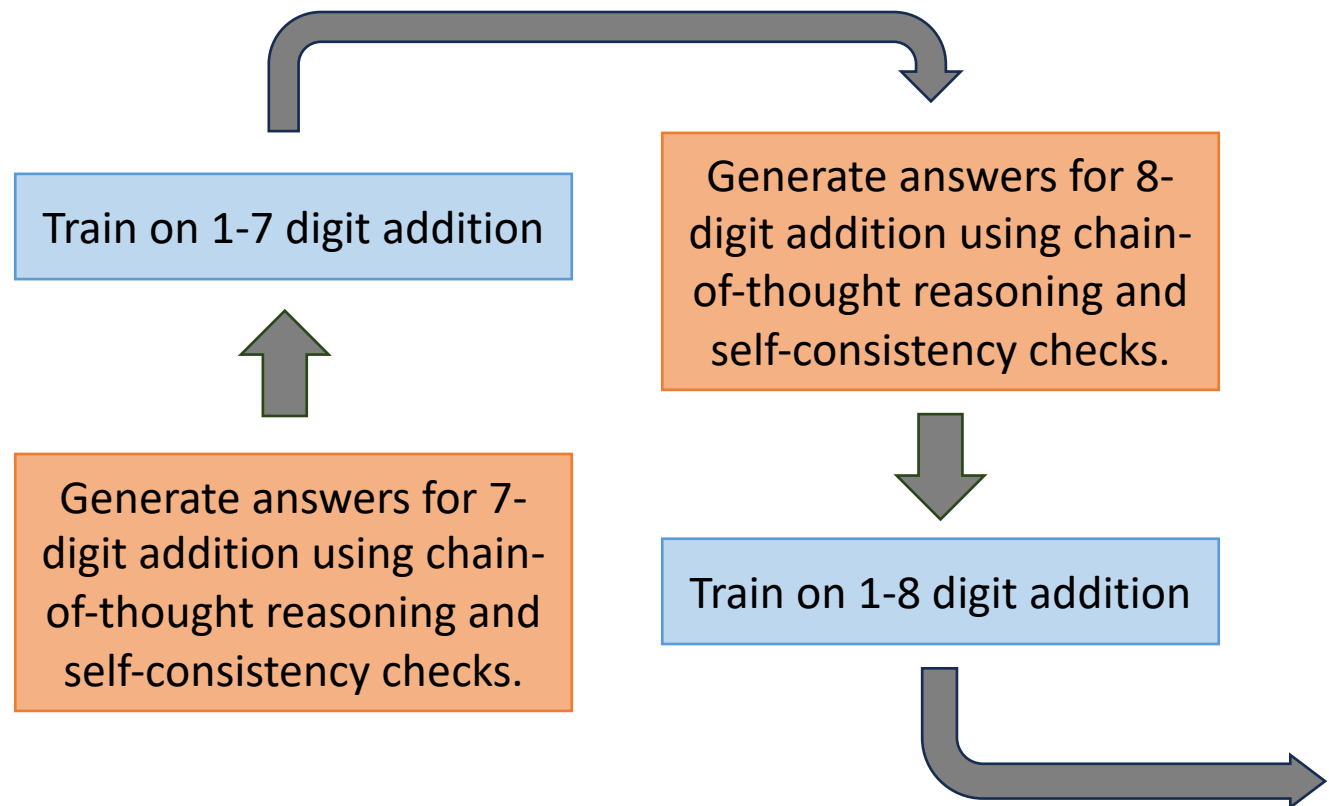

All training data is self-generated by the model

Until self training fails
