# Supplementary material
Source: ML conference proceedings conference paper supplement (https://openreview.net/forum?id=mR5pknv2oP)

1e6

Learning Trajectory of the 582M ByT5 Model

Total Training Examples Seen

1.50  
1.25  
1.00  
0.75  
0.50  
0.25  
0.00

3 4 5 6 7 8 9 10 11 12 13 14 15 16 17 18 19 20 21 22 23 24 25 26 27 28

Addition Problem Length

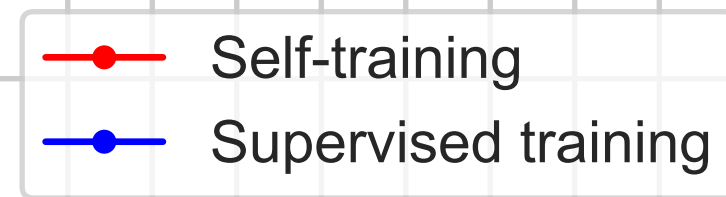

Supplement: supplementary_material [file attachment]

# Error Rate When Generating N+1 Digit Addition

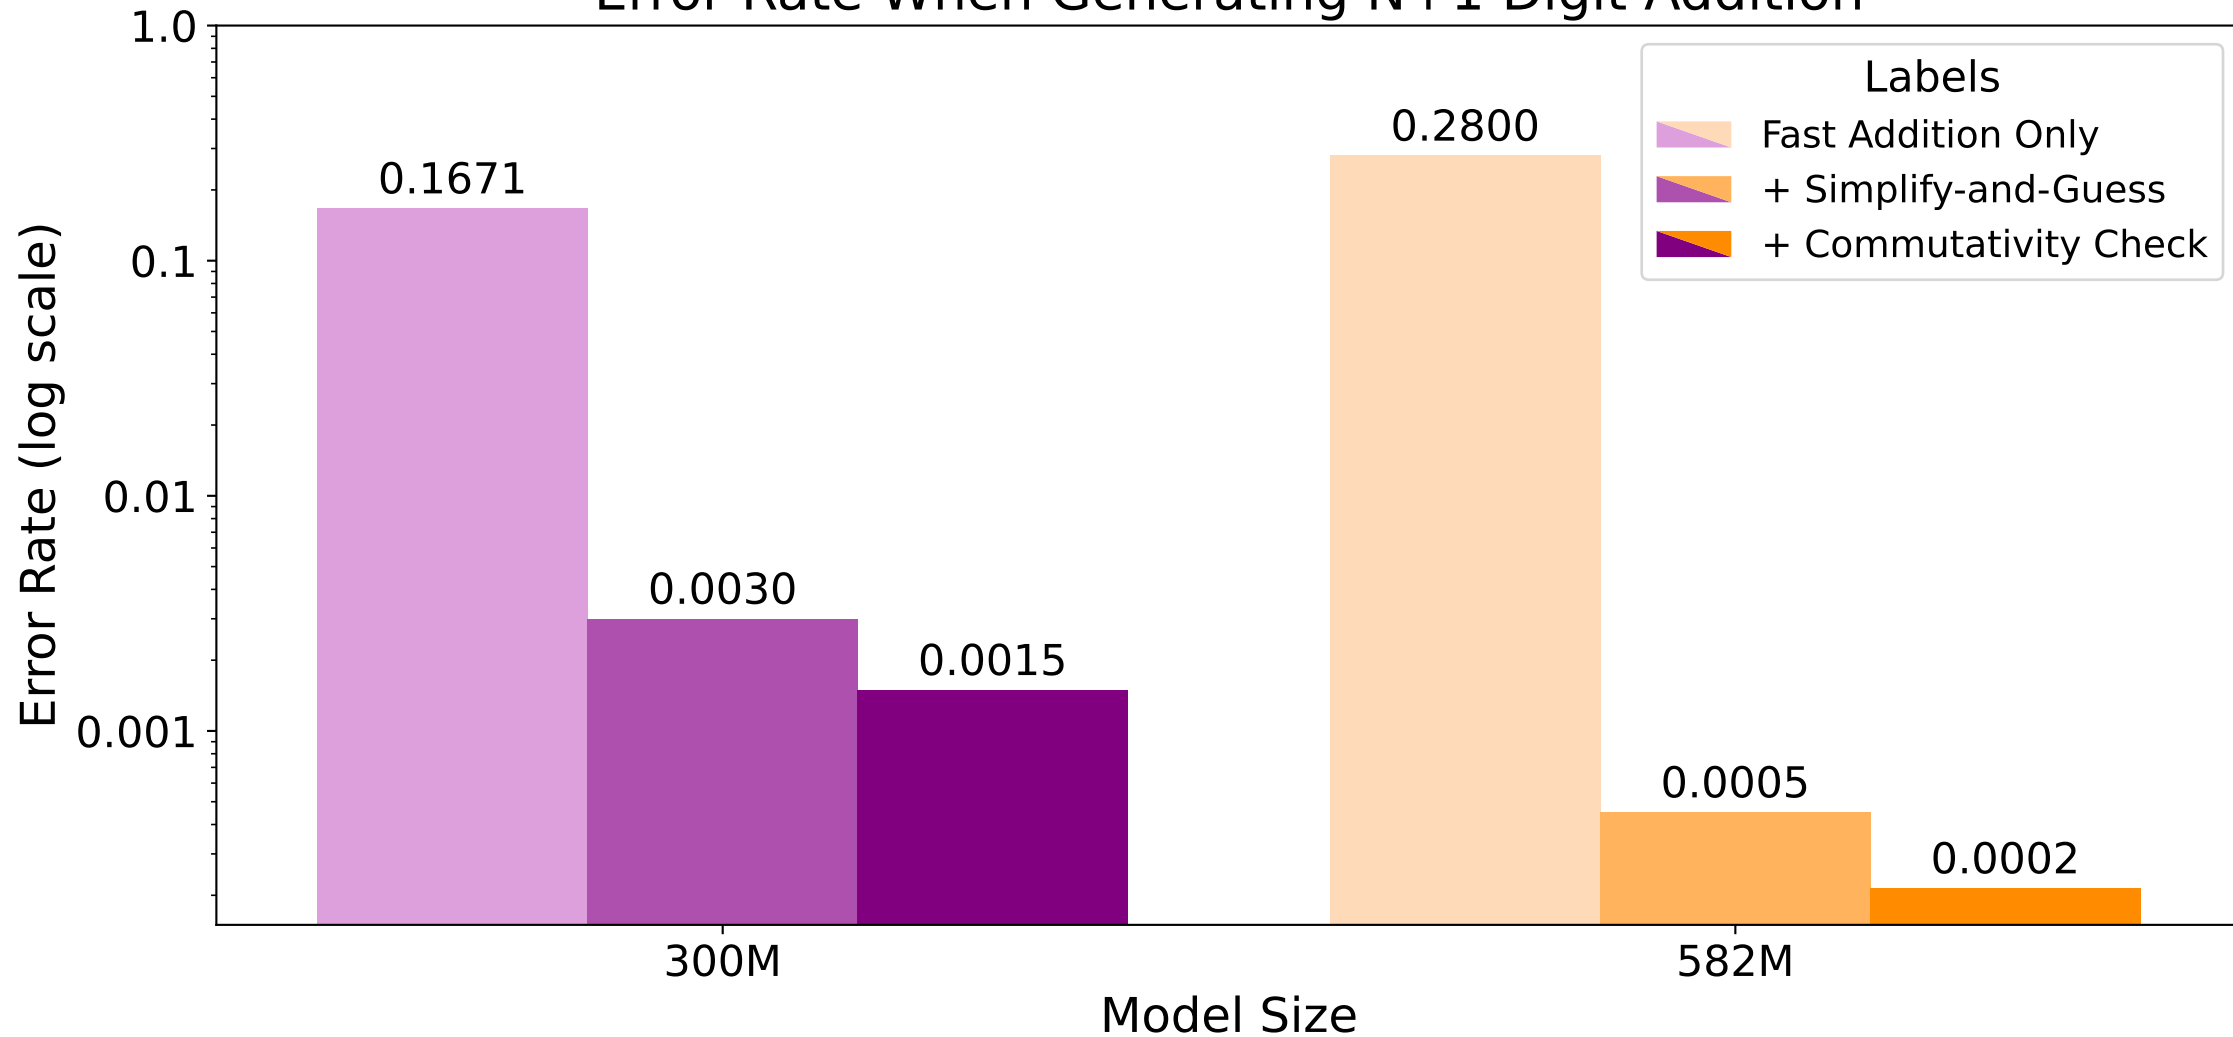

Supplement: supplementary_material [file attachment]

Addition Accuracy w/o CoT (300M)

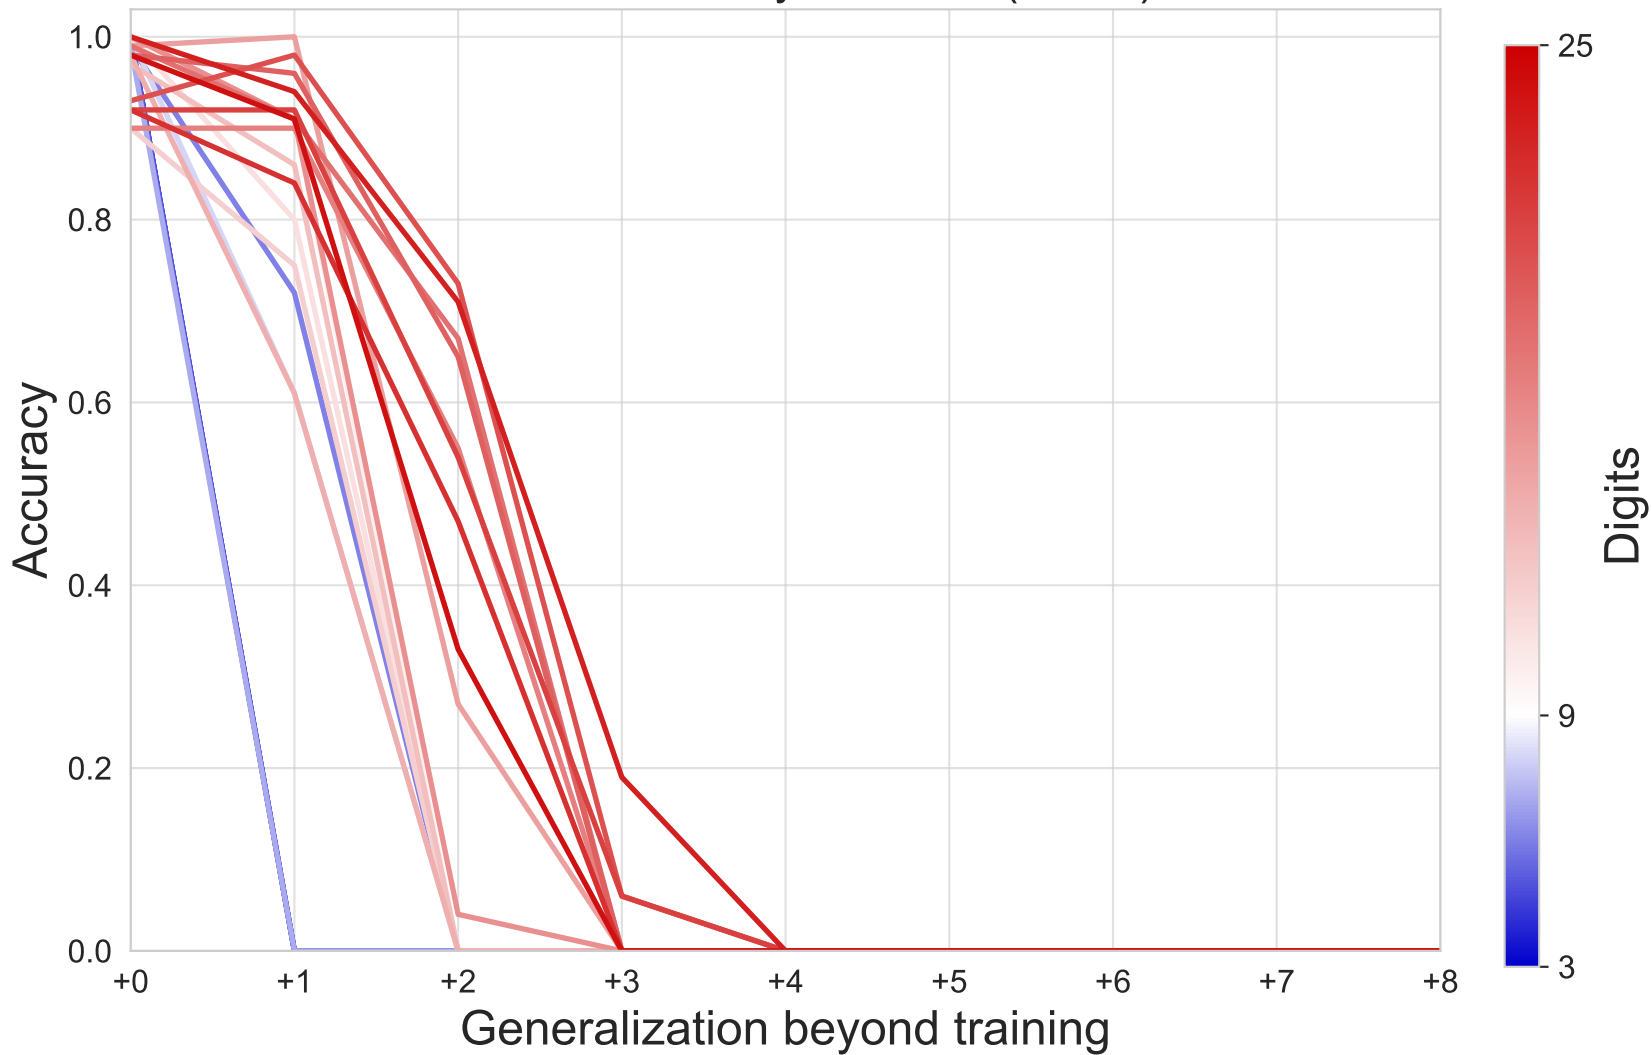

Supplement: supplementary_material [file attachment]

### Addition Accuracy w/o CoT (582M)

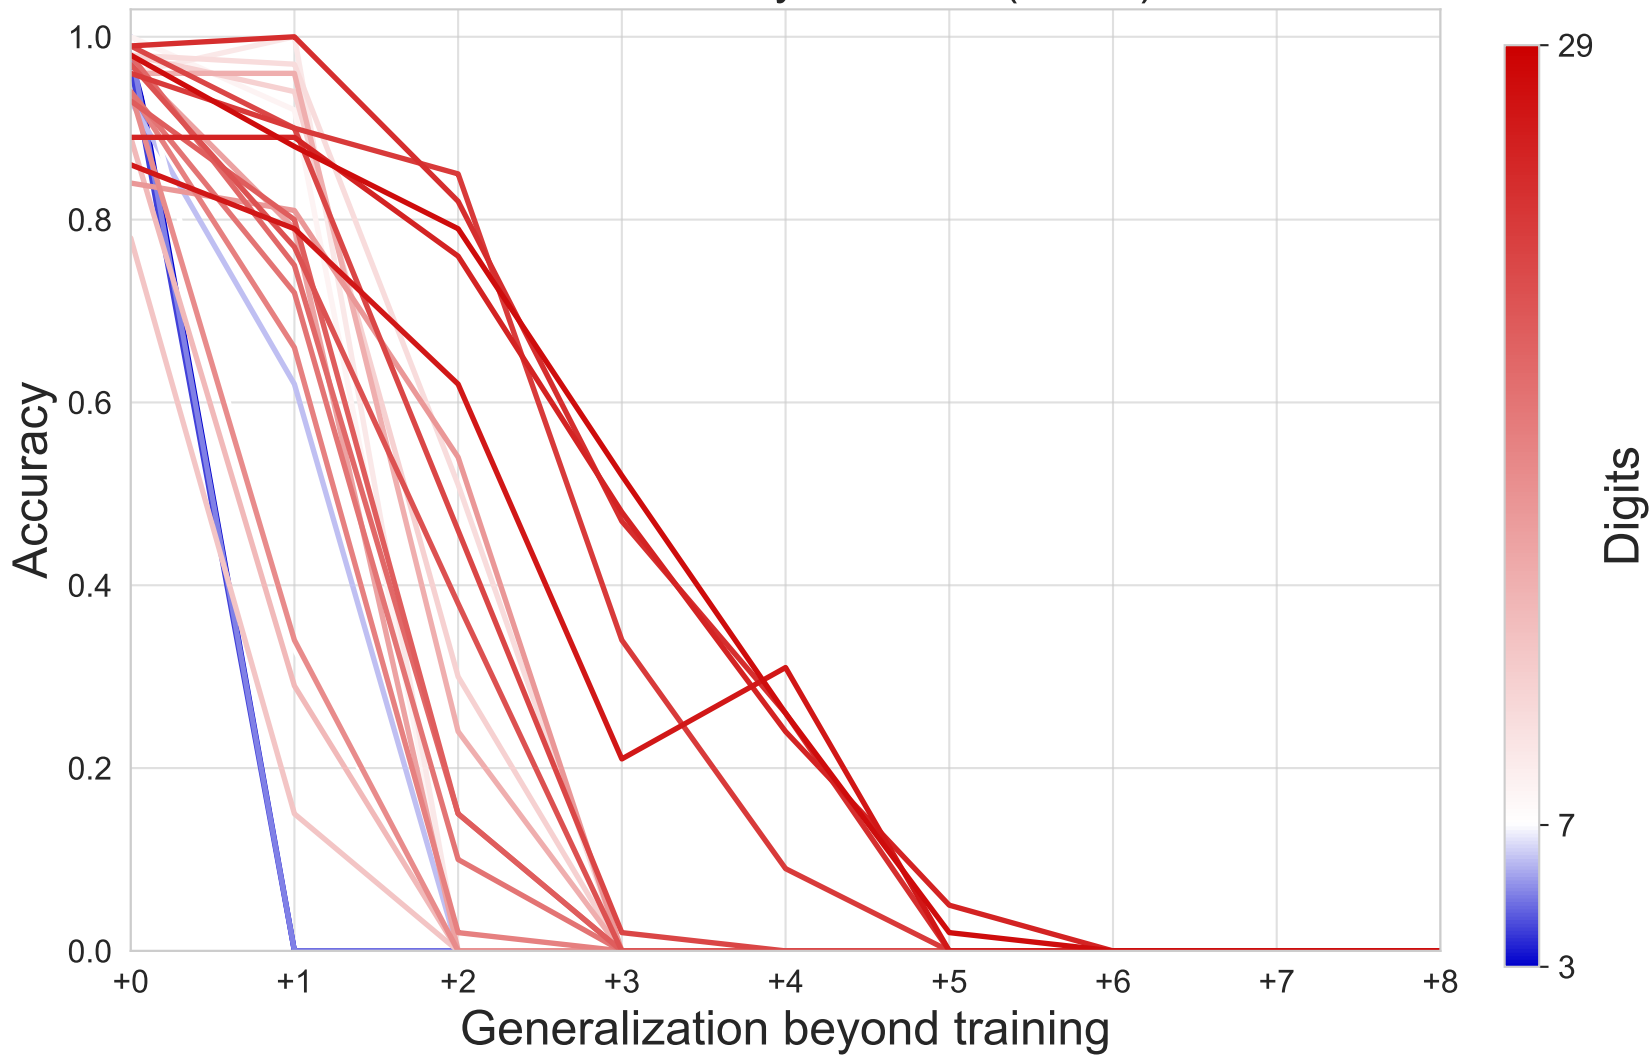

Supplement: supplementary_material [file attachment]

# Length Generalization (582M)

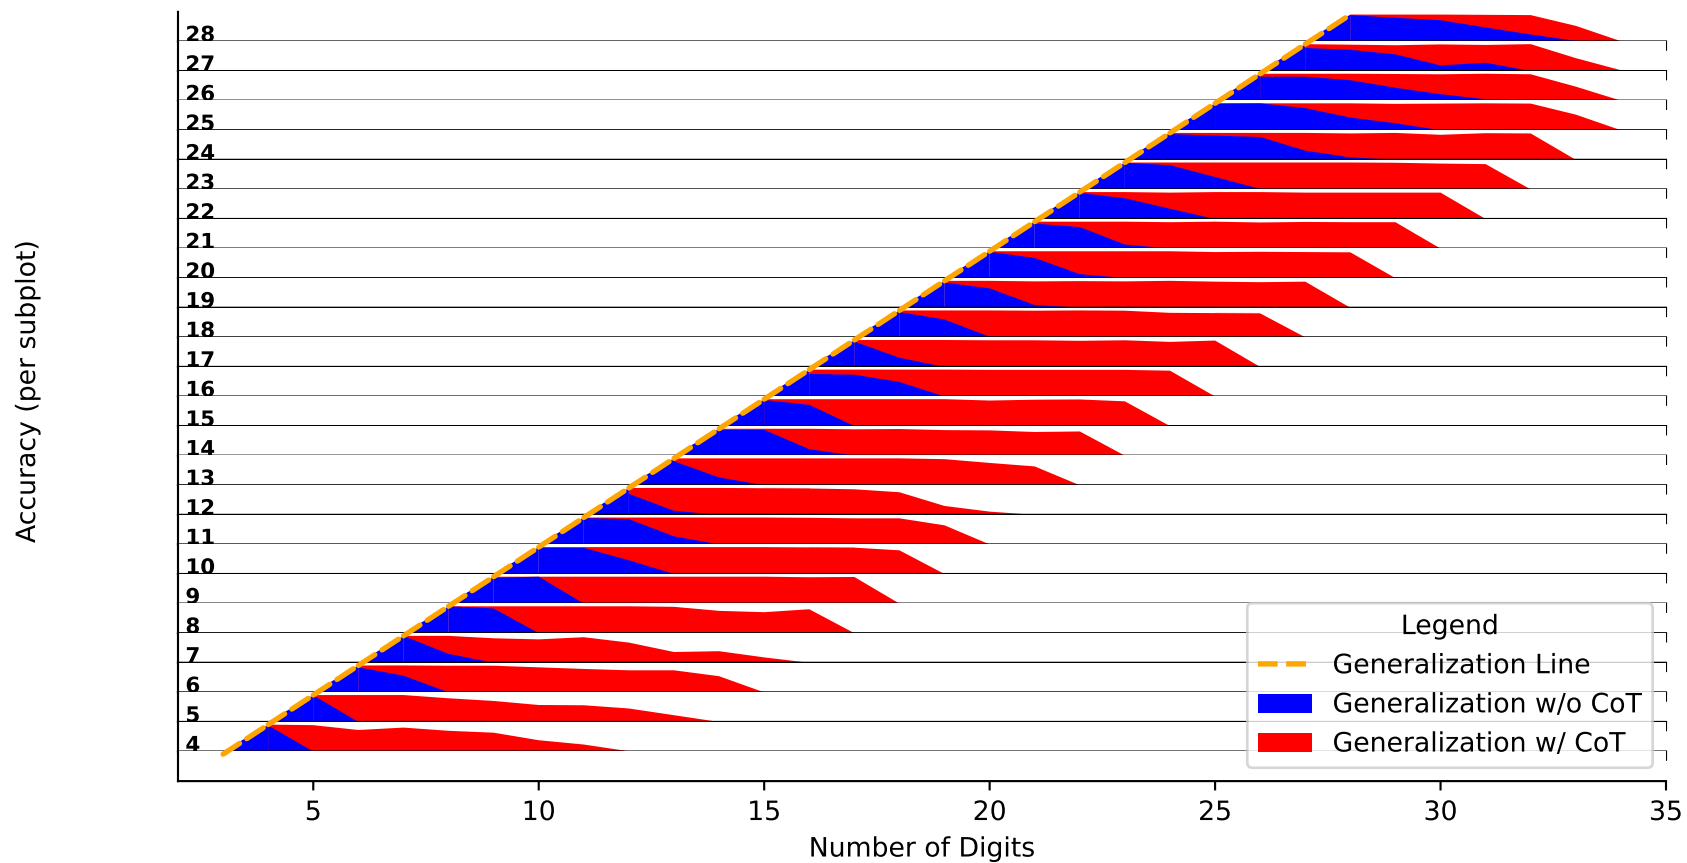

Supplement: supplementary_material [file attachment]

Length Generalization

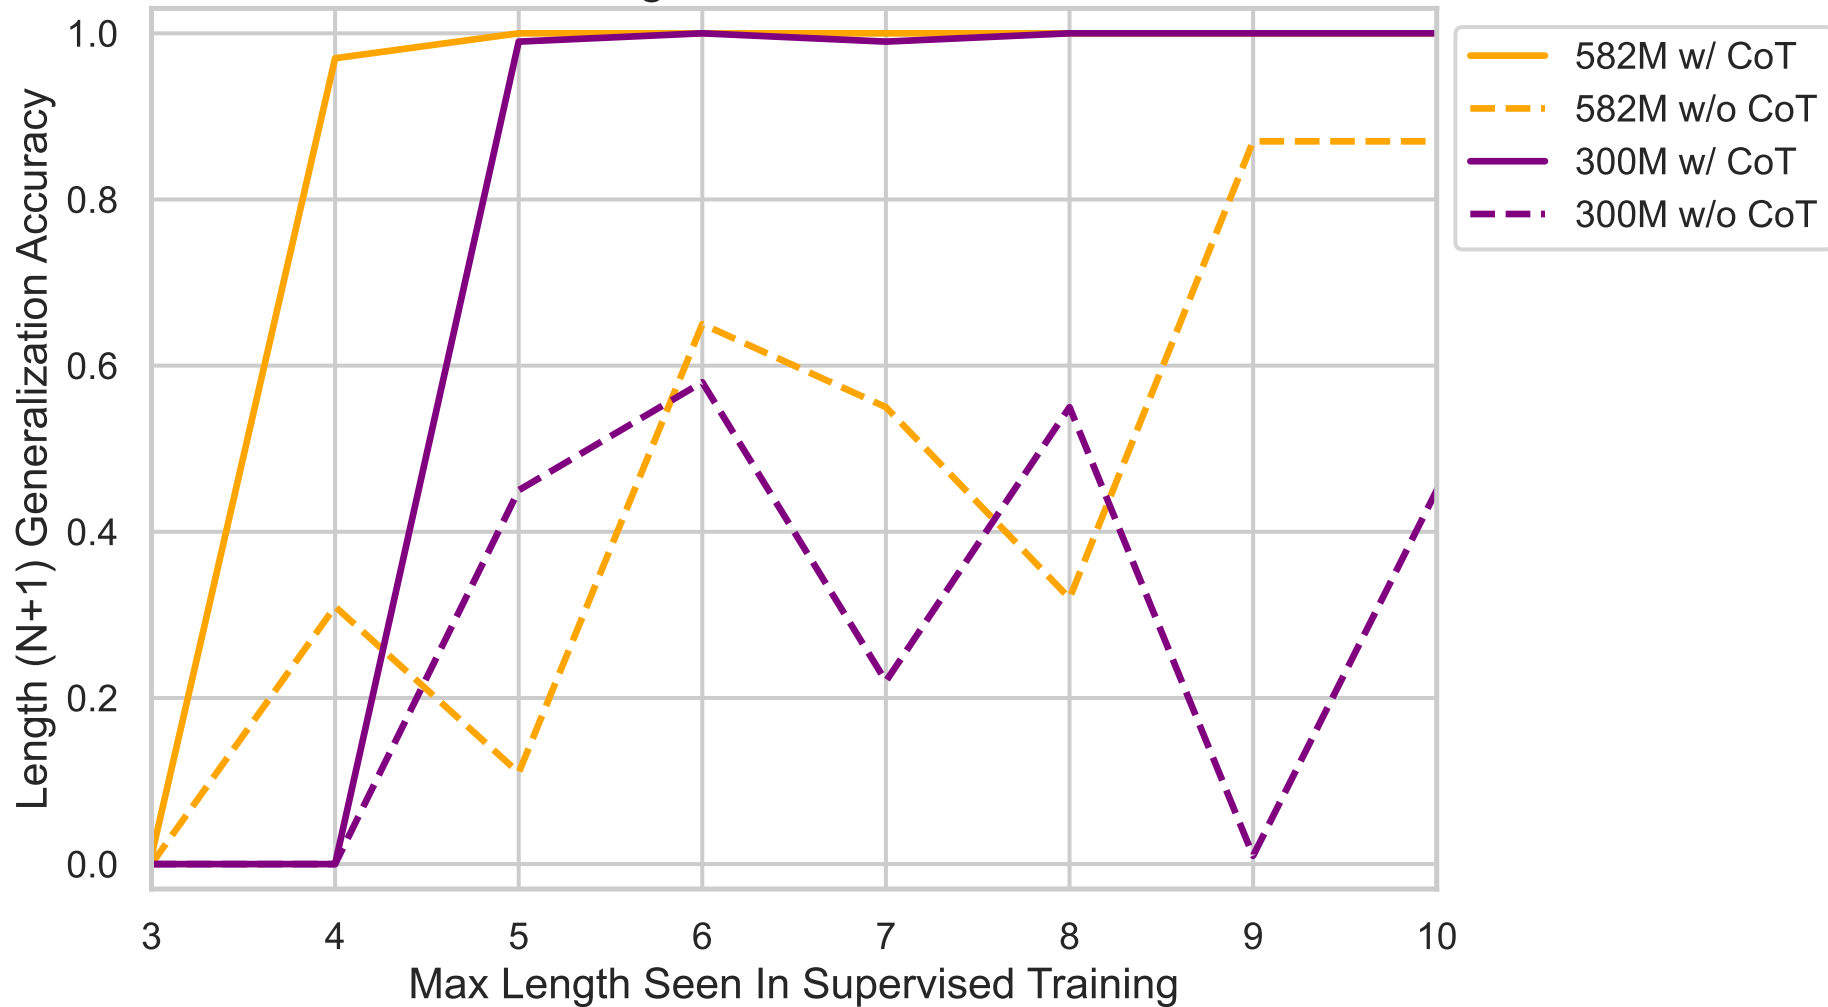

Supplement: supplementary_material [file attachment]

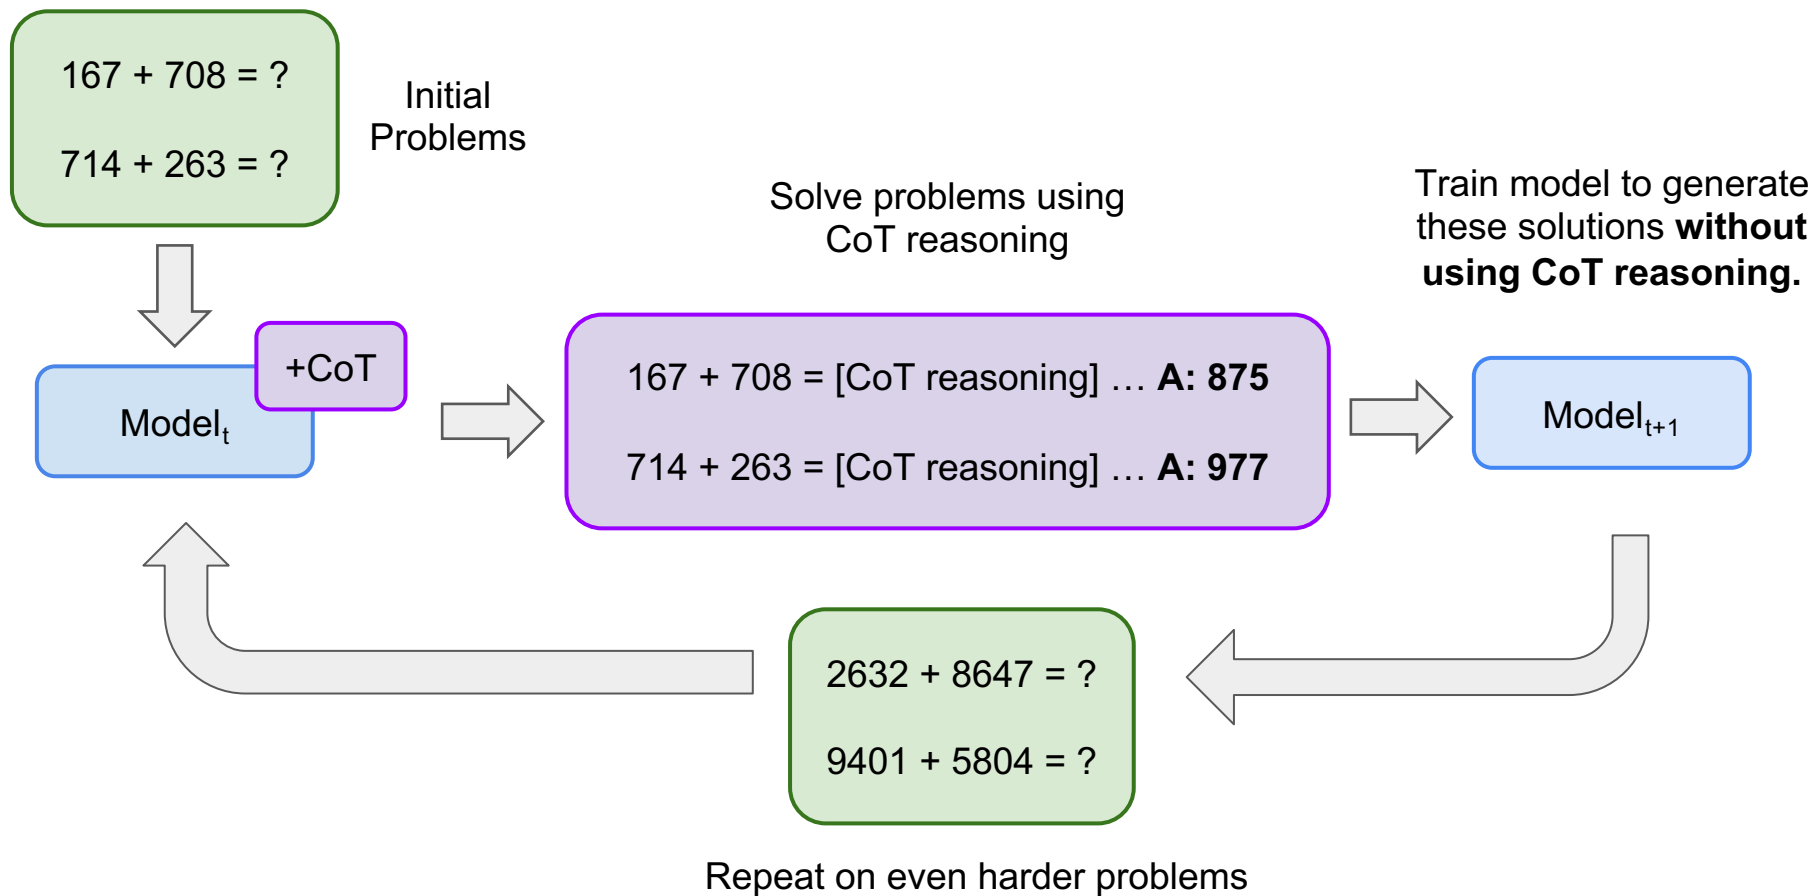

Supplement: supplementary_material [file attachment]

Learning Trajectory of the 300M ByT5 Model

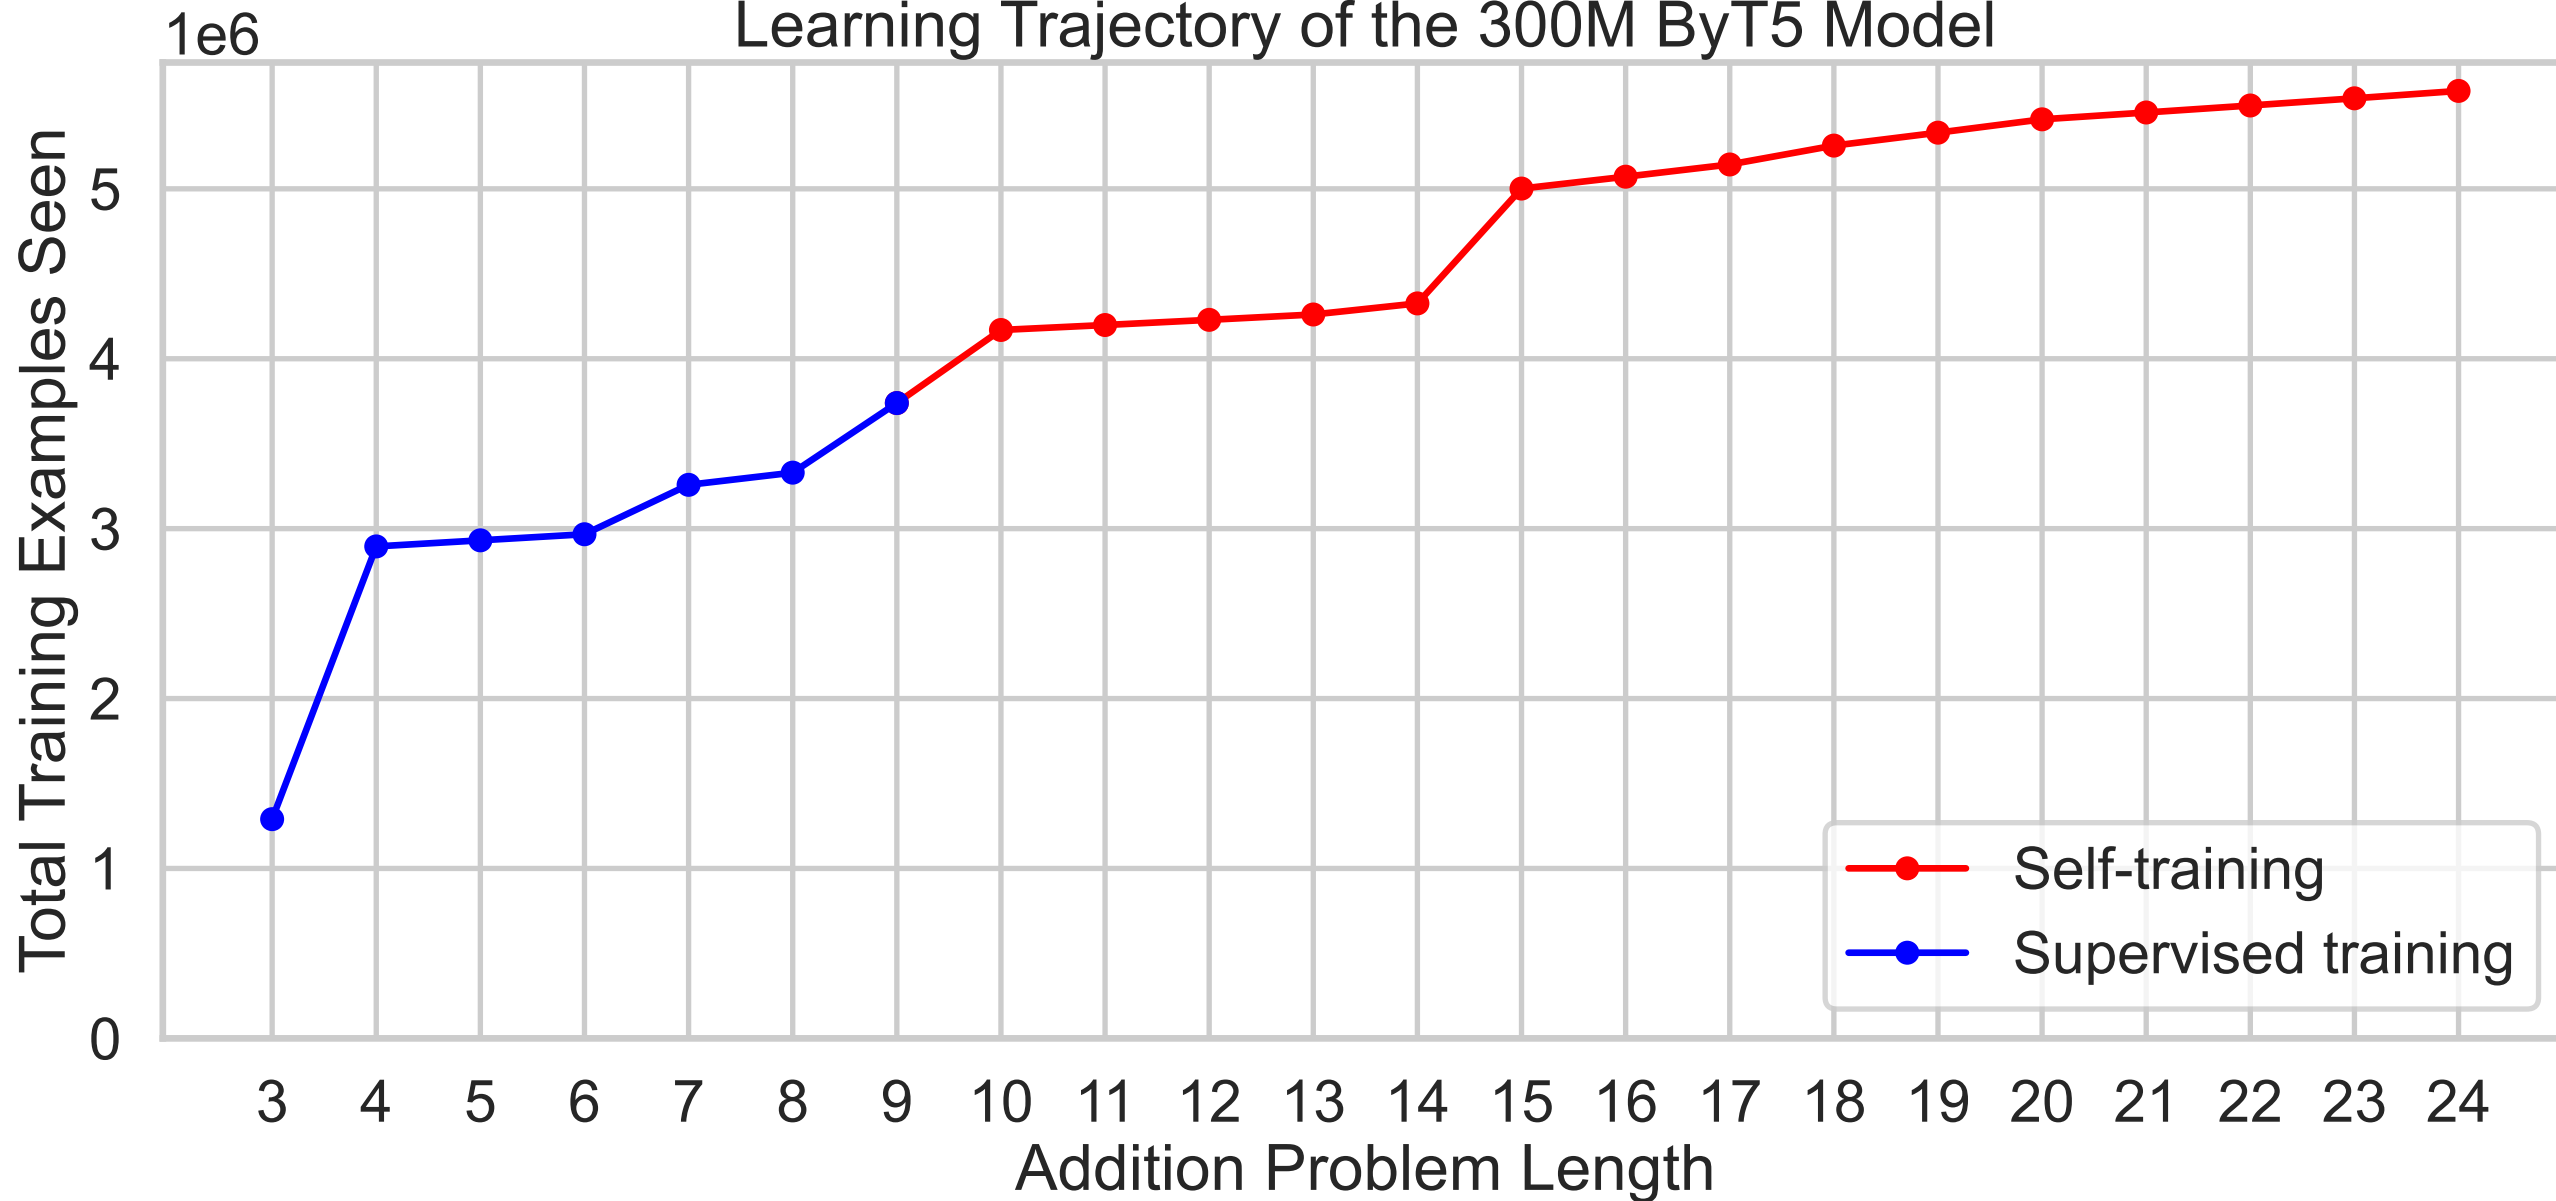

Supplement: supplementary_material [file attachment]

### Addition Accuracy w/ CoT (300M)

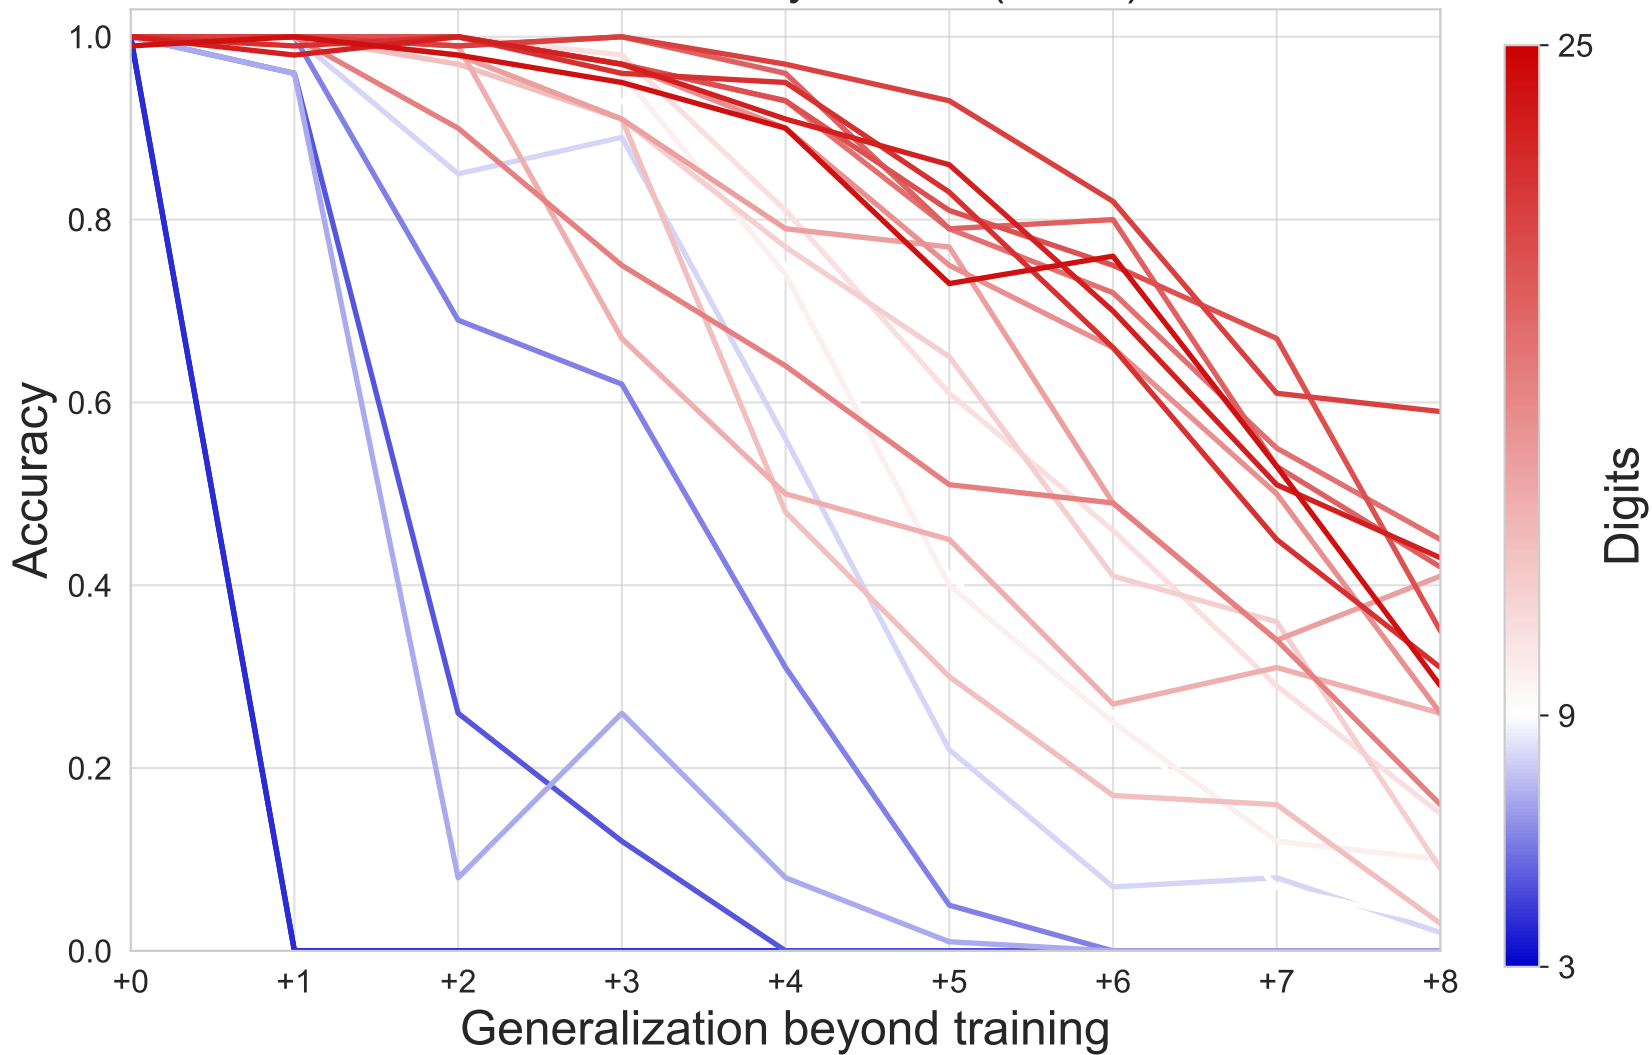

Supplement: supplementary_material [file attachment]

Addition Accuracy w/ CoT (582M)

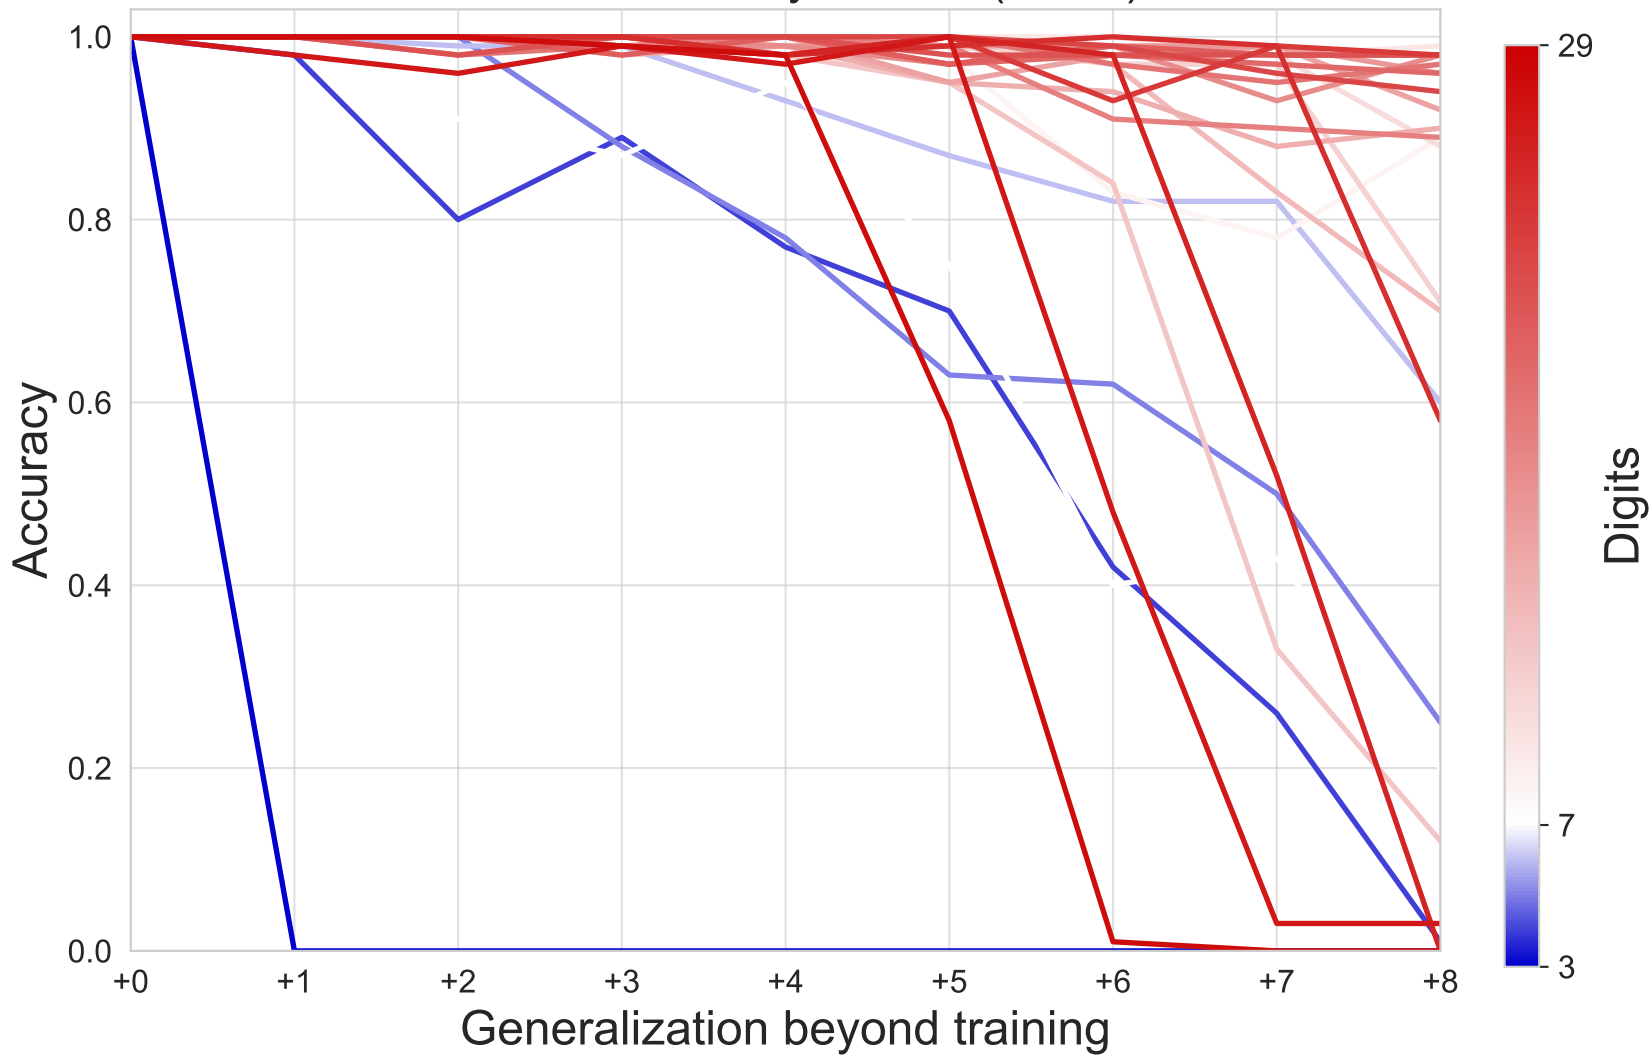

Supplement: supplementary_material [file attachment]
